# Supplementary material for: A strategy of synergistic optimization: gold and lithium co-doped vanadium oxide as a hole-injection layer for high-performance OLEDs
Source: Royal Society of Chemistry journal article supplement (doi:10.1039/d2tc03121c), 2022-01-01
Supplement: d2tc03121c1.pdf [file d2tc03121c1.pdf]

## **Electronic Supplementary Information (ESI†)**

### **A strategy of synergistic optimization: gold and lithium co-doped vanadium oxide as a hole-injection layer for high-performance OLEDs**

Han Zhang,<sup>ab</sup> Wenqing Zhu,<sup>\*ab</sup> Lu Huang,<sup>a</sup> Chen Yi,<sup>ab</sup> Ruilin Chen,<sup>ab</sup> Yipeng Chen<sup>ab</sup> and Jun Li<sup>a</sup>

<sup>a</sup> School of Materials Science and Engineering, Shanghai University, Shanghai 200444, People's Republic of China

<sup>b</sup> Key Laboratory of Advanced Display and System Applications, Ministry of Education, Shanghai University, Shanghai 200072, People's Republic of China

Corresponding author. Email: wqzhu@shu.edu.cn (W. Zhu)

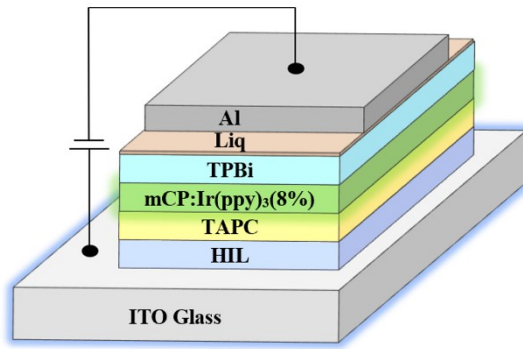

**Fig. S1** Schematic structure of OLEDs.

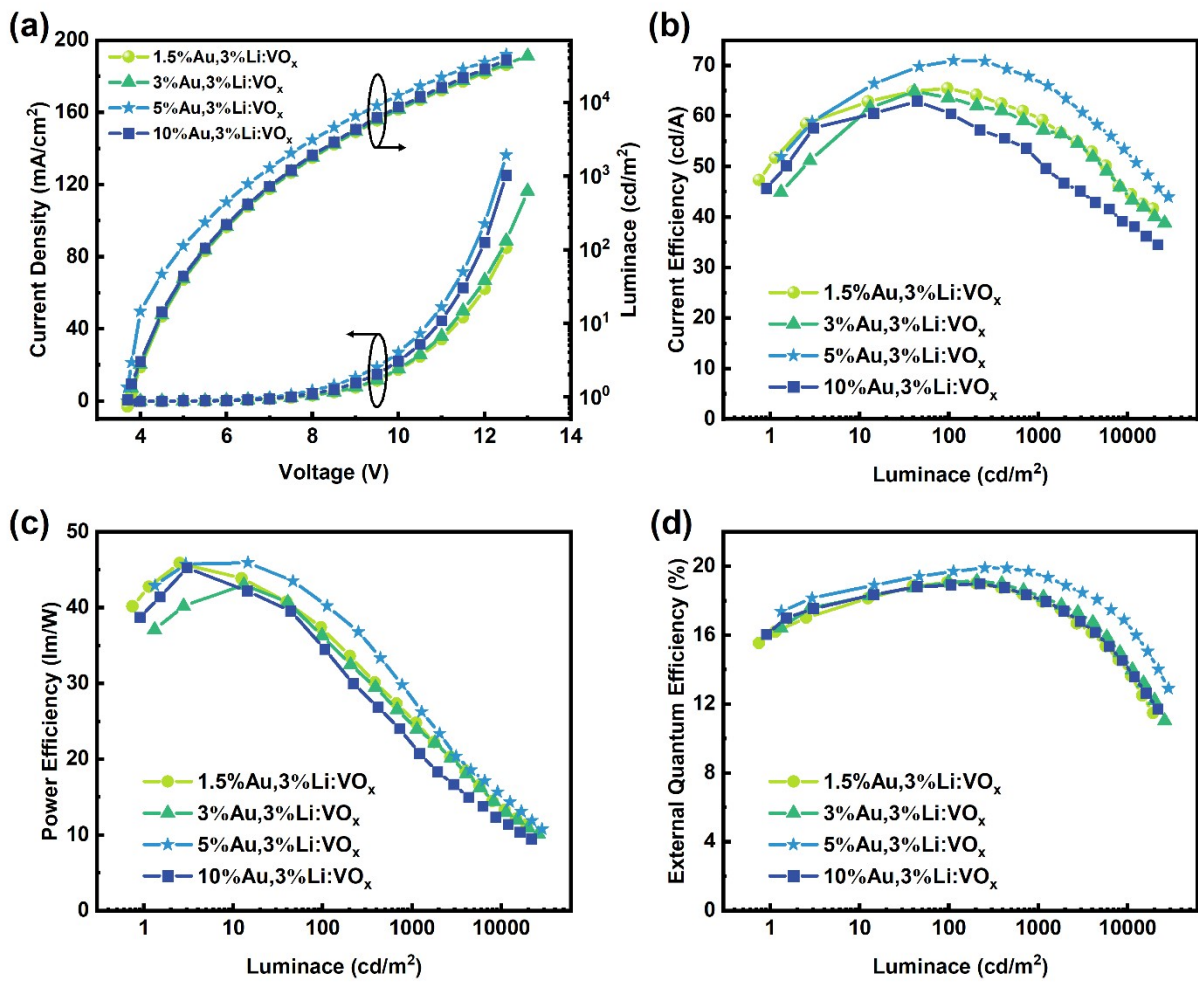

**Fig. S2** (a) Current density-voltage-luminance (J-V-L), (b) CE-L, (c) PE-L and (d) EQE-L characteristics of devices based on  $m\%Au, 3\%Li:VO_x$  HILs ( $m=1.5, 3, 5, 10$ ).

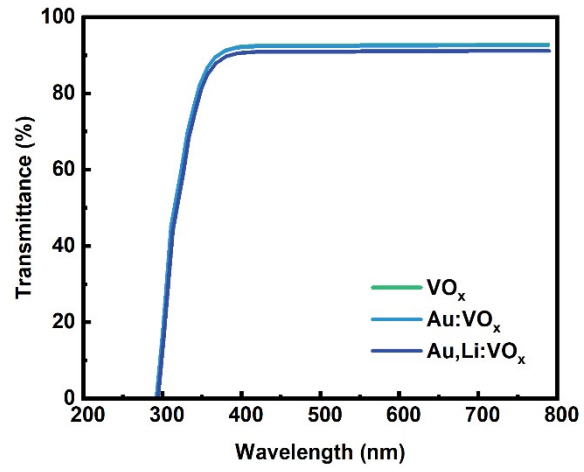

**Fig. S3** Optical transmission spectra of  $\text{VO}_x$ ,  $\text{Au:VO}_x$  and  $\text{Au,Li:VO}_x$  films on quartz substrates.

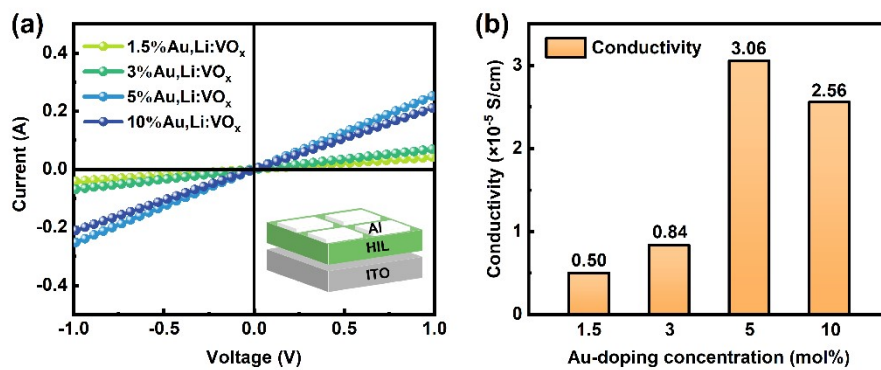

**Fig. S4** (a) I–V curves and (b) the electrical conductivity of  $m\% \text{Au,Li:VO}_x$  ( $m=1.5, 3, 5$  and  $10$ ) films based on the ITO/HILs/Al structure as shown in the inset.

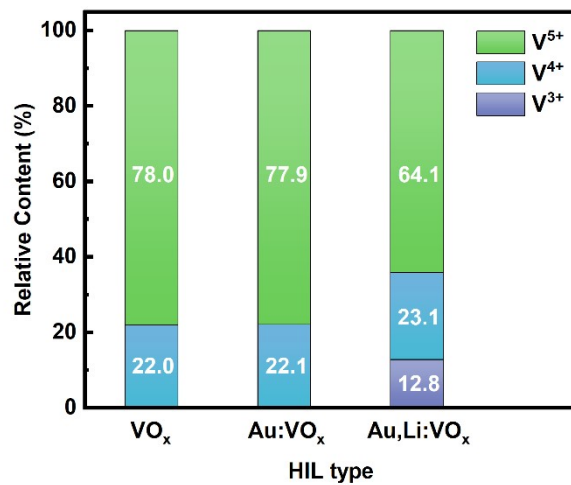

**Fig. S5** Quantitative comparisons of V<sup>5+</sup>, V<sup>4+</sup> and V<sup>3+</sup> contents in VO<sub>x</sub>, Au:VO<sub>x</sub> and Au,Li:VO<sub>x</sub> films.

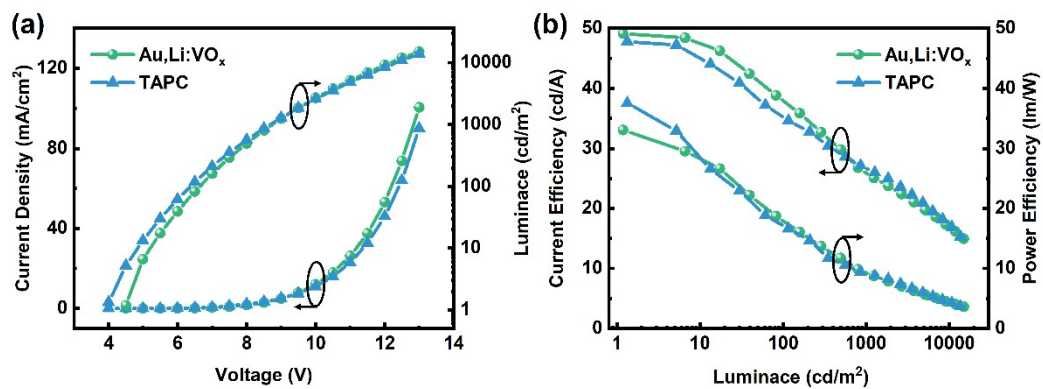

**Fig. S6** (a) J-V-L and (b) CE-L-PE characteristics of devices based on different HTLs (Au,Li:VO<sub>x</sub> and TAPC)
